# Supplementary material
Source: publisher figshare collection journal article supplement (https://acs.figshare.com/ndownloader/files/3784012)
Supplement: Supplementary file 1 [file 3784012]

data_
_chemical_name_mineral ?Mg2/3Fe4/3B2O5?
_cell_length_a  3.20919(53)
_cell_length_b  6.1770(10)
_cell_length_c  9.3504(16)
_cell_angle_alpha 104.5648(24)
_cell_angle_beta  90.8568(22)
_cell_angle_gamma 91.7687(22)
_cell_volume 179.262(52)
_symmetry_space_group_name_H-M P-1
loop_
_symmetry_equiv_pos_as_xyz
	'-x, -y, -z'
	'x, y, z'
loop_
_atom_site_label
_atom_site_type_symbol
_atom_site_symmetry_multiplicity
_atom_site_fract_x
_atom_site_fract_y
_atom_site_fract_z
_atom_site_occupancy
_atom_site_B_iso_or_equiv
M1 Mg   0 0.23527(94) 0.36677(47) 0.10135(33) 0.33 0
M1 Fe   0 0.23527(94) 0.36677(47) 0.10135(33) 0.67 1.327(63)
M2 Mg   0 0.73703(97) 0.21051(48) 0.36015(31) 0.33 0
M2 Fe   0 0.73703(97) 0.21051(48) 0.36015(31) 0.67 1.395(71)
B1 11B   0 0.33850(98) 0.87762(52) 0.16979(35) 1 0.747(42)
B2 11B   0 0.30464(90) 0.31962(51) 0.64440(33) 1 0.662(42)
O1 O   0 0.2251(13) 0.08873(69) 0.18140(42) 1 0.953(51)
O2 O   0 0.2653(12) 0.69521(68) 0.05484(45) 1 0.871(55)
O3 O   0 0.4384(12) 0.14123(61) 0.70152(42) 1 0.927(53)
O4 O   0 0.2405(14) 0.27699(66) 0.50030(45) 1 1.052(55)
O5 O   0 0.7433(12) 0.47463(67) 0.25880(41) 1 0.798(54)
